# Supplementary material for: Cation dependent charge transport in linear dicarboxylate based isotypical 1D coordination polymers
Source: Royal Society of Chemistry journal article supplement (doi:10.1039/c7ra00165g), 2017-01-01
Supplement: c7ra00165g1.pdf [file c7ra00165g1.pdf]

## Electronic Supplementary Information

### Cation dependent charge transport in linear dicarboxylate based isotypical 1D coordination polymers

Faruk Ahmed,<sup>a</sup> Joydeep Datta,<sup>b</sup> Basudeb Dutta,<sup>a</sup> Kaushik Naskar,<sup>c</sup> Chittaranjan Sinha,<sup>c</sup> Seikh Mafiz Alam,<sup>a</sup> Suman Kundu,<sup>d</sup> Partha Pratim Ray,<sup>\* b</sup> and Mohammad Hedayetullah Mir<sup>\*a</sup>

<sup>a</sup>Department of Chemistry, Aliah University, New Town, Kolkata 700 156, India. Email: chmmir@gmail.com

<sup>b</sup>Department of Physics, Jadavpur University, Jadavpur, Kolkata 700 032, India. Email: parthapray@yahoo.com

<sup>c</sup>Department of Chemistry, Jadavpur University, Jadavpur, Kolkata 700 032, India.

<sup>d</sup>Department of Chemistry, R. K. M. Residential College, Narendrapur, Kolkata 700 103, India.

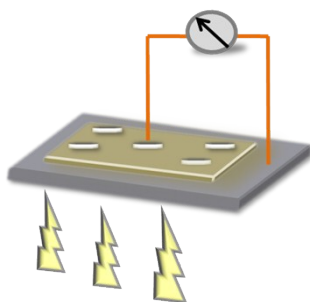

**Fig. S1** The structure of Device-a (or Device-b).

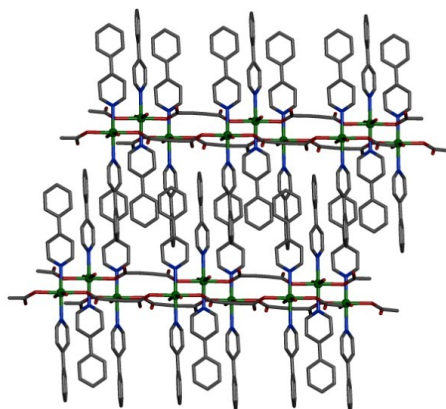

**Fig. S2** A view of 3D supramolecular framework in compound **1**.

**Table S1** Crystal data and refinement parameters for compounds **1** and **2**

| Formula                                                                     | C <sub>26</sub> H <sub>22</sub> CdN <sub>2</sub> O <sub>6</sub> ( <b>1</b> ) | C <sub>26</sub> H <sub>22</sub> ZnN <sub>2</sub> O <sub>6</sub> ( <b>2</b> ) |
|-----------------------------------------------------------------------------|------------------------------------------------------------------------------|------------------------------------------------------------------------------|
| fw                                                                          | 570.85                                                                       | 523.85                                                                       |
| cryst syst                                                                  | triclinic                                                                    | monoclinic                                                                   |
| space group                                                                 | <i>P</i> $\bar{1}$                                                           | <i>C</i> 2/ <i>c</i>                                                         |
| <i>a</i> (Å)                                                                | 9.4482(9)                                                                    | 9.8479(4)                                                                    |
| <i>b</i> (Å)                                                                | 10.0882(9)                                                                   | 27.7163(13)                                                                  |
| <i>c</i> (Å)                                                                | 14.7102(13)                                                                  | 9.3837(4)                                                                    |
| $\alpha$ (deg)                                                              | 72.942(3)                                                                    | 90                                                                           |
| $\beta$ (deg)                                                               | 82.840(3)                                                                    | 114.8410(10)                                                                 |
| $\gamma$ (deg)                                                              | 64.910(3)                                                                    | 90                                                                           |
| <i>V</i> (Å <sup>3</sup> )                                                  | 1213.95(19)                                                                  | 2324.28(18)                                                                  |
| <i>Z</i>                                                                    | 2                                                                            | 4                                                                            |
| <i>D</i> <sub>calcd</sub> (g/cm <sup>3</sup> )                              | 1.562                                                                        | 1.497                                                                        |
| $\mu$ (mm <sup>-1</sup> )                                                   | 0.944                                                                        | 1.103                                                                        |
| $\lambda$ (Å)                                                               | 0.71073                                                                      | 0.71073                                                                      |
| data [ <i>I</i> > 2 $\sigma$ ( <i>I</i> )]/params                           | 5903/333                                                                     | 2833/169                                                                     |
| GOF on <i>F</i> <sup>2</sup>                                                | 1.135                                                                        | 1.069                                                                        |
| final <i>R</i> indices [ <i>I</i> > 2 $\sigma$ ( <i>I</i> )] <sup>a,b</sup> | R1 = 0.0575<br>wR2 = 0.1518                                                  | R1 = 0.0447<br>wR2 = 0.1180                                                  |

<sup>a</sup> R1 =  $\Sigma||F_o| - |F_c|| / \Sigma|F_o|$ , <sup>b</sup> wR2 =  $[\Sigma w(F_o^2 - F_c^2)^2 / \Sigma w(F_o^2)^2]^{1/2}$ .

**Table S2** Selected bond lengths and bond angles in **1**

|                  |            |                  |            |
|------------------|------------|------------------|------------|
| Cd(1)-O(3)       | 2.289(3)   | Cd(1)-O(1)       | 2.306(3)   |
| Cd(1)-O(5)a      | 2.292(3)   | Cd(1)-N(2)       | 2.339(4)   |
| Cd(1)-O(2)       | 2.301(3)   | Cd(1)-N(1)       | 2.343(5)   |
| O(3)-Cd(1)-O(5)a | 178.18(11) | O(2)-Cd(1)-N(2)  | 84.15(14)  |
| O(3)-Cd(1)-O(2)  | 90.83(12)  | O(1)-Cd(1)-N(2)  | 83.23(14)  |
| O(5)a-Cd(1)-O(2) | 88.54(11)  | O(3)-Cd(1)-N(1)  | 89.00(13)  |
| O(3)-Cd(1)-O(1)  | 88.32(11)  | O(5)a-Cd(1)-N(1) | 89.38(13)  |
| O(5)-Cd(1)-O(1)  | 92.67(12)  | O(2)-Cd(1)-N(1)  | 96.41(13)  |
| O(2)-Cd(1)-O(1)  | 167.32(14) | O(1)-Cd(1)-N(1)  | 96.23(13)  |
| O(3)-Cd(1)-N(2)  | 91.87(14)  | N(2)-Cd(1)-N(1)  | 178.96(14) |
| O(5)a-Cd(1)-N(2) | 89.76(14)  |                  |            |

Symmetry Code: a = x, -1+y, z

**Table S3** Selected bond lengths and bond angles in **2**

|                  |           |                   |           |
|------------------|-----------|-------------------|-----------|
| Zn(1)-O(1)       | 2.104(2)  | Zn(1)-O(2)a       | 2.139(2)  |
| Zn(1)-O(1)a      | 2.104(2)  | Zn(1)-N(1)        | 2.131(3)  |
| Zn(1)-O(2)       | 2.139(2)  | Zn(1)-N(2)        | 2.150(3)  |
| O(1)-Zn(1)-O(2)  | 90.55(7)  | N(1)-Zn(1)-O(1)a  | 93.36(5)  |
| O(1)-Zn(1)-O(1)a | 173.28(8) | N(2)-Zn(1)-O(2)a  | 89.79(5)  |
| O(2)-Zn(1)-N(2)  | 89.79(5)  | O(1)-Zn(1)-N(2)   | 86.64(5)  |
| N(1)-Zn(1)-N(2)  | 180.00(3) | O(2)-Zn(1)-N(1)   | 90.21(5)  |
| N(2)-Zn(1)-O(1)a | 86.64(5)  | O(2)-Zn(1)-O(2)a  | 179.59(7) |
| O(1)-Zn(1)-N(1)  | 93.36(5)  | N(1)-Zn(1)-O(2)a  | 90.21(5)  |
| O(1)-Zn(1)-O(2)a | 89.42(7)  | O(1)b-Zn(1)-O(2)a | 90.55(7)  |
| O(2)-Zn(1)-O(1)a | 89.42(7)  |                   |           |

Symmetry Code: a = 1-x, y, 3/2-z

**Table S4** Intermolecular hydrogen bonding interactions in **1** and **2**.

|                   | D-H...A           | D-H<br>(Å) | H...A (Å) | D...A (Å) | <D-H...A<br>(°) | Symmetry            |
|-------------------|-------------------|------------|-----------|-----------|-----------------|---------------------|
| <b>Compound 1</b> | O(1)-H(1A)...O(5) | 1.00(8)    | 1.69(8)   | 2.688(6)  | 173(8)          | 1-x,1-y,1-z         |
|                   | O(2)-H(2B)...O(3) | 1.00(7)    | 1.72(7)   | 2.712(6)  | 178(8)          | -x,1-y,1-z          |
| <b>Compound 2</b> | O(1)-H(1B)...O(2) | 0.88(4)    | 1.85(4)   | 2.727(3)  | 175(5)          | -1/2+x,3/2-y,-1/2+z |

**Table S5** C-H... $\pi$  interactions in **1** and **2**.

|                   | C-H→ ring(j)     | H...R<br>distance (Å) | C-H...R<br>angle(deg) | C...R<br>distance (Å) |
|-------------------|------------------|-----------------------|-----------------------|-----------------------|
| <b>Compound 1</b> | C(12)-H(12)→R(1) | 3.375                 | 157.27                | 4.248                 |
|                   | C(16)-H(16)→R(1) | 3.306                 | 151.36                | 4.146                 |
|                   | C(7)-H(7)→R(2)   | 3.188                 | 151.81                | 4.031                 |
|                   | C(8)-H(8)→R(3)   | 3.506                 | 159.05                | 4.388                 |
|                   | C(10)-H(10)→R(3) | 3.382                 | 152.12                | 4.225                 |
|                   | C(11)-H(11)→R(2) | 3.410                 | 160.41                | 4.300                 |
| <b>Compound 2</b> | C(8)-H(8)→R(4)   | 3.251                 | 155.02                | 4.112                 |
|                   | C(5)-H(5)→R(5)   | 3.169                 | 154.16                | 4.026                 |
|                   | C(6)-H(6)→R(6)   | 3.409                 | 155.52                | 4.272                 |

R(j) denotes the j-th ring: R(1) = N(1)/C(1)/C(2)/C(3)/C(4)/C(5); R(2)= C(17)/C(18)/C(19)/C(20)/C(21)/C(22); R(3) = N(2)/C(12)/C(13)/C(14)/C(15)/C(16); R(4)= N(1)/C(1)/C(2)/C(3)/C(2)/C(1); R(5) = C(11)/C(12)/C(13)/C(14)/C(13)/C(12); R(6) = C(10)/C(9)/C(8)/N(2)/C(8)/C(9)

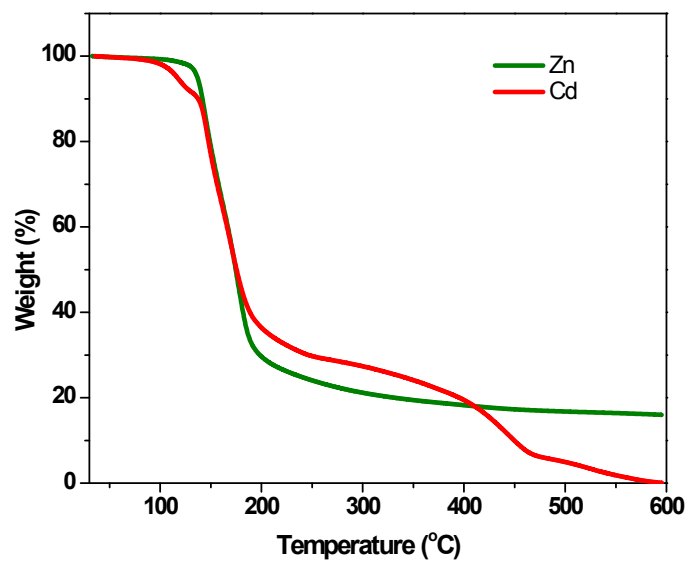

**Fig. S3** TGA plots of compounds **1** (red) and **2** (green) measured under N<sub>2</sub> atmosphere.

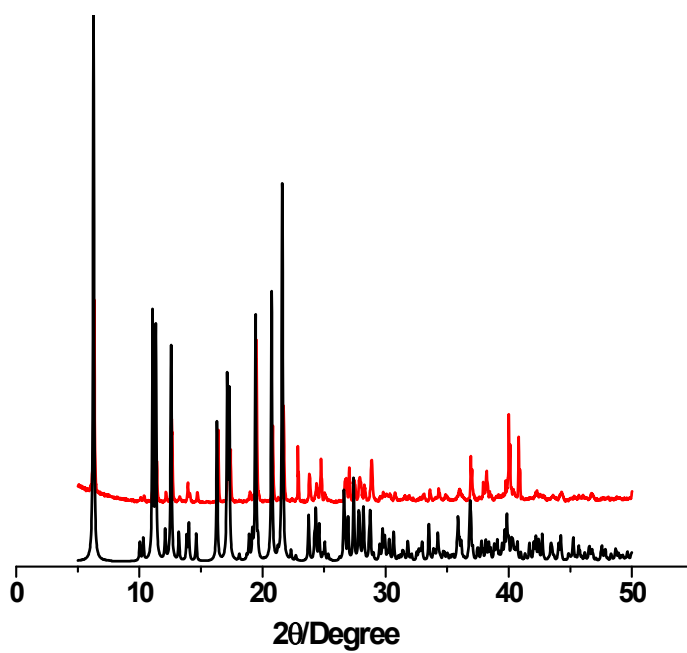

**Fig. S4** Powder X-ray diffraction patterns of simulated **1** (black) and as-synthesized **1** (red).

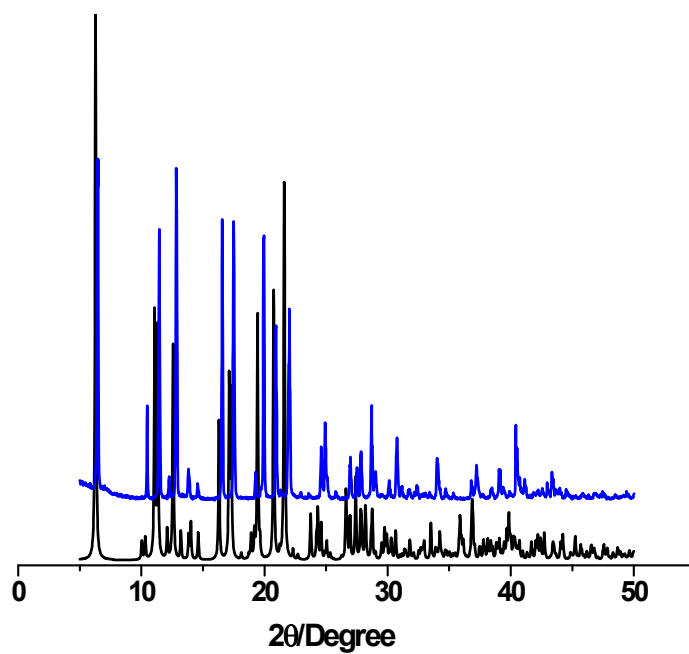

**Fig. S5** Powder X-ray diffraction patterns of simulated **2** (black) and as-synthesized **2** (blue).

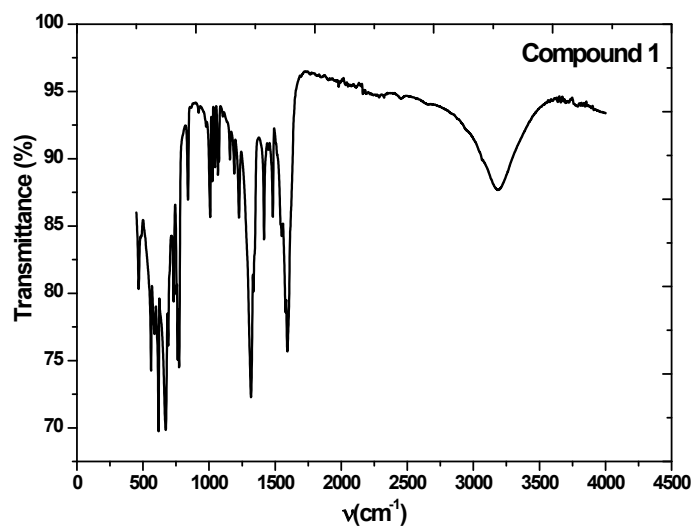

**Fig. S6** FT-IR spectra of compound **1**.

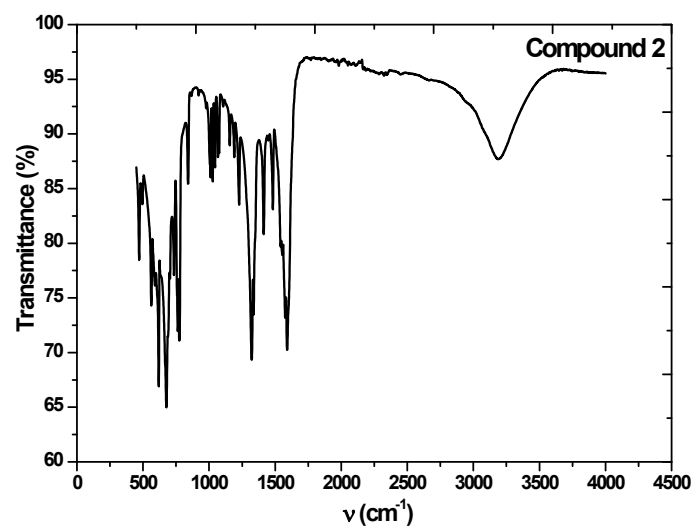

**Fig. S7** FT-IR spectra of compound **2**.
